# Supplementary material for: 1H NMR Serum Metabolomic Change of Trimethylamine N-oxide (TMAO) Is Associated with Alcoholic Liver Disease Progression
Source: MDPI journal article supplement (doi:10.3390/metabo14010039), 2024-01-08
Supplement: s1 [file s1]

**Supplementary Figure S1.** PCA score plot of serum from ALD patients according to CTP classification.

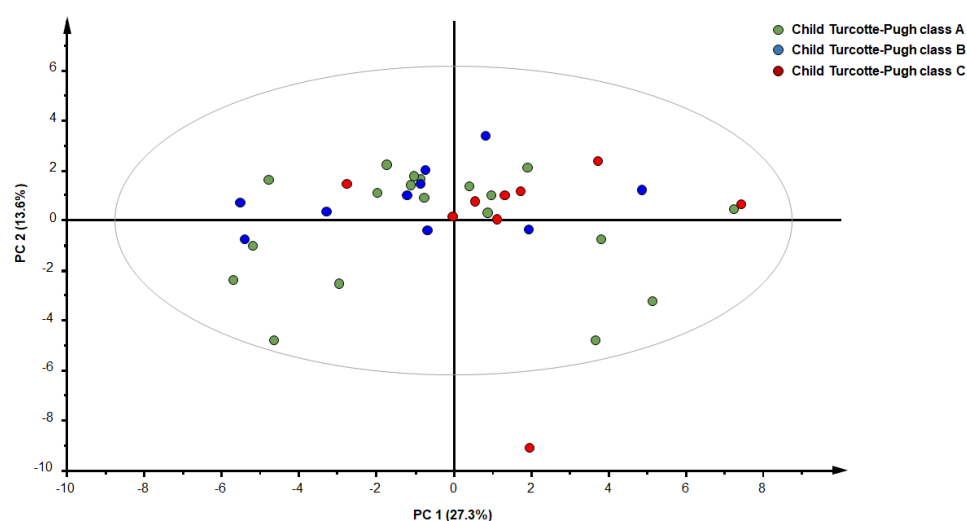

**Supplementary Table S1.** VIP score of serum metabolites using the optimized PLS model.

| Number | Metabolites          | VIP Score |
|--------|----------------------|-----------|
| 1      | TMAO                 | 2.01439   |
| 2      | Malate               | 1.82034   |
| 3      | Isobutyrate          | 1.78457   |
| 4      | Tyrosine             | 1.56147   |
| 5      | 2-Hydroxyisovalerate | 1.51803   |
| 6      | Isocitrate           | 1.42660   |
| 7      | Betaine              | 1.38775   |
| 8      | Taurine              | 1.38672   |
| 9      | Valine               | 1.37450   |
| 10     | 1-Methylhistidine    | 1.16860   |
| 11     | Leucine              | 1.04756   |
| 12     | 3-Hydroxykynurenine  | 1.02633   |
| 13     | Aspartate            | 0.96292   |
| 14     | Arginine             | 0.95248   |
| 15     | Phenylalanine        | 0.95239   |
| 16     | Lysine               | 0.93355   |
| 17     | Proline              | 0.91881   |
| 18     | Glucose              | 0.89987   |
| 19     | Choline              | 0.88390   |
| 20     | Glycine              | 0.84607   |
| 21     | Carnitine            | 0.83875   |
| 22     | Lactate              | 0.83551   |
| 23     | Glycerol             | 0.79663   |
| 24     | Guanidoacetate       | 0.78919   |

|    |                     |         |
|----|---------------------|---------|
| 25 | Asparagine          | 0.77668 |
| 26 | Alanine             | 0.76710 |
| 27 | TMA                 | 0.73531 |
| 28 | Glutamate           | 0.70986 |
| 29 | Isoleucine          | 0.67752 |
| 30 | 2-Oxoglutarate      | 0.62770 |
| 31 | Glycocholate        | 0.60840 |
| 32 | Glutamine           | 0.60468 |
| 33 | Pyruvate            | 0.59050 |
| 34 | 3-Hydroxykynurenine | 0.53477 |
| 35 | Cholate             | 0.53273 |
| 36 | Succinate           | 0.52979 |
| 37 | Fumarate            | 0.51269 |
| 38 | Acetate             | 0.48609 |
| 39 | Oxypurinol          | 0.41296 |
| 40 | Histidine           | 0.38157 |
| 41 | Methanol            | 0.29770 |
| 42 | Serine              | 0.24594 |

**Supplementary Table S2.** Parameters from permutation test of PLS-DA models derived from various VIP cut-off values. If R2 values exceeded 0.5 and were greater than Q2 values, the model was deemed valid. The model is considered valid if the R2Y intercept falls below 0.3–0.4 and the Q2Y intercept is under 0.05.

| VIP cut-off | metabolites | R <sup>2</sup> Y | Q <sup>2</sup> Y | R <sup>2</sup> Y intercept | Q <sup>2</sup> Y intercept |
|-------------|-------------|------------------|------------------|----------------------------|----------------------------|
| 0.6         | 32          | 0.432            | 0.275            | 0.177                      | -0.232                     |
| 0.7         | 28          | 0.439            | 0.298            | 0.159                      | -0.241                     |
| 0.8         | 22          | 0.417            | 0.291            | 0.135                      | -0.234                     |
| 0.9         | 17          | 0.428            | 0.315            | 0.127                      | -0.225                     |
| 1.0         | 12          | 0.556            | 0.450            | 0.103                      | -0.223                     |
| 1.1         | 10          | 0.586            | 0.500            | 0.077                      | -0.223                     |
| 1.2         | 9           | 0.587            | 0.501            | 0.063                      | -0.222                     |
| 1.4         | 6           | 0.621            | 0.539            | 0.054                      | -0.227                     |

**Supplementary Table S3.** ROC analysis of serum metabolites to compare CTP class A and class C.

| Metabolites          | AUC      | P value  | Fold Change |
|----------------------|----------|----------|-------------|
| TMAO                 | 0.871249 | 0.000296 | -0.609790   |
| Isobutyrate          | 0.865249 | 0.000326 | -0.434990   |
| 2-Hydroxyisovalerate | 0.865249 | 0.000613 | -0.818210   |
| Malate               | 0.865249 | 0.000711 | 0.378714    |
| Tyrosine             | 0.842257 | 0.002507 | -0.457450   |
| Isocitrate           | 0.833461 | 0.009678 | -0.406500   |
| Valine               | 0.795322 | 0.012783 | 0.355839    |
| Taurine              | 0.748538 | 0.015085 | -0.431060   |
| Leucine              | 0.730994 | 0.037655 | 0.235521    |
| Betaine              | 0.730994 | 0.018489 | -0.393030   |

|                     |          |          |           |
|---------------------|----------|----------|-----------|
| 1-Methylhistidine   | 0.713450 | 0.059070 | -0.351810 |
| Alanine             | 0.701754 | 0.056992 | 0.248049  |
| Lysine              | 0.684211 | 0.093231 | -0.275460 |
| 3-Hydroxybutyrate   | 0.654971 | 0.372316 | -0.380270 |
| 2-Oxoglutarate      | 0.649123 | 0.336757 | 0.070514  |
| Arginine            | 0.631579 | 0.149560 | -0.300790 |
| 3-Hydroxykynurenine | 0.608187 | 0.124220 | -0.271770 |
| Glucose             | 0.602339 | 0.235291 | -0.251680 |
| Glycerol            | 0.602339 | 0.337537 | 0.018865  |
| Proline             | 0.590643 | 0.317781 | -0.195800 |
| Glycine             | 0.590643 | 0.291960 | 0.016668  |
| Histidine           | 0.584795 | 0.653018 | 0.037353  |
| Glutamate           | 0.578947 | 0.298829 | 0.170587  |
| Phenylalanine       | 0.573099 | 0.199704 | -0.208540 |
| Acetate             | 0.573099 | 0.758335 | -0.013340 |
| Guanidoacetate      | 0.573099 | 0.422998 | 0.032831  |
| Cholate             | 0.567251 | 0.524494 | -0.177590 |
| Isoleucine          | 0.561404 | 0.755531 | -0.025000 |
| Asparagine          | 0.561404 | 0.429534 | 0.080188  |
| Oxypurinol          | 0.549708 | 0.541969 | -0.056390 |
| Lactate             | 0.543860 | 0.773830 | -0.116820 |
| Aspartate           | 0.543860 | 0.298340 | 0.126686  |
| Fumarate            | 0.543860 | 0.500284 | -0.136440 |
| Choline             | 0.543860 | 0.321957 | -0.212920 |
| TMA                 | 0.526316 | 0.674676 | 0.006361  |
| Pyruvate            | 0.514620 | 0.710996 | -0.140380 |
| Serine              | 0.514620 | 0.645388 | -0.111990 |
| Glycocholate        | 0.508772 | 0.944799 | -0.054690 |
| Glutamine           | 0.508772 | 0.955132 | -0.060690 |
| Methanol            | 0.502924 | 0.854979 | -0.094150 |
| Succinate           | 0.502924 | 0.695224 | -0.030350 |
| Carnitine           | 0.502924 | 0.460488 | -0.143660 |

Supplementary Table S4. ROC analysis of serum metabolites to compare CTP class A and class B.

| Metabolites          | AUC      | P value  | Fold Change |
|----------------------|----------|----------|-------------|
| Valine               | 0.82105  | 0.00431  | 0.52905     |
| Isobutyrate          | 0.8      | 0.00245  | 0.46405     |
| 2-Hydroxyisovalerate | 0.794737 | 0.012213 | -0.57098    |
| Malate               | 0.778947 | 0.006256 | -0.1177     |
| 1-Methylhistidine    | 0.778947 | 0.019309 | -0.2316     |
| TMAO                 | 0.768421 | 0.007886 | -0.2942     |
| Lactate              | 0.710526 | 0.039644 | -0.32992    |
| Tyrosine             | 0.705263 | 0.039814 | -0.21606    |
| Taurine              | 0.7      | 0.034696 | -0.22774    |
| Glutamine            | 0.668421 | 0.106374 | -0.027164   |
| Betaine              | 0.663158 | 0.045536 | -0.2033     |
| Succinate            | 0.652632 | 0.62013  | 0.029565    |
| 3-hydroxybutyrate    | 0.647368 | 0.16057  | 0.7434      |
| Phenylalanine        | 0.636842 | 0.158392 | -0.021115   |
| Glycocholate         | 0.631579 | 0.506483 | 0.20711     |
| Arginine             | 0.631579 | 0.105404 | 0.28363     |
| Fumarate             | 0.631579 | 0.257923 | -0.11737    |
| isoleucine           | 0.626316 | 0.32448  | 0.25155     |
| isocitrate           | 0.626316 | 0.255685 | -0.063728   |
| Alanine              | 0.605263 | 0.247032 | -0.06489    |

|                     |          |          |           |
|---------------------|----------|----------|-----------|
| Glucose             | 0.605263 | 0.136674 | -0.14971  |
| Choline             | 0.6      | 0.106556 | -0.16145  |
| Pyruvate            | 0.594737 | 0.403983 | 0.3159    |
| Carnitine           | 0.589474 | 0.078912 | -0.14248  |
| TMA                 | 0.589474 | 0.436809 | 0.19596   |
| Cholate             | 0.584211 | 0.946803 | 0.18697   |
| Serine              | 0.584211 | 0.467657 | -0.055098 |
| Asparagine          | 0.578947 | 0.769454 | 0.14871   |
| Aspartate           | 0.578947 | 0.457313 | 0.20546   |
| Leucine             | 0.573684 | 0.21785  | 0.29189   |
| Proline             | 0.568421 | 0.453804 | 0.20709   |
| 2-oxoglutarate      | 0.563158 | 0.382716 | 0.019011  |
| Glycine             | 0.563158 | 0.611898 | 0.069802  |
| Glutamate           | 0.557895 | 0.570206 | 0.19265   |
| Oxypurinol          | 0.547368 | 0.519414 | 0.12372   |
| Guanidoacetate      | 0.547368 | 0.951221 | 0.13707   |
| Glycerol            | 0.547368 | 0.757619 | 0.085013  |
| Acetate             | 0.536842 | 0.414429 | 0.12662   |
| Histidine           | 0.531579 | 0.384253 | 0.022719  |
| Lysine              | 0.526316 | 0.607451 | 0.14207   |
| 3-Hydroxykynurenine | 0.515789 | 0.6285   | 0.057618  |
| Methanol            | 0.510526 | 0.996954 | 0.083046  |

Supplementary Table S5. ROC analysis of serum metabolites to compare CTP class B and class C.

| Metabolites          | AUC      | P value  | Fold Change |
|----------------------|----------|----------|-------------|
| Alanine              | 0.811111 | 0.023938 | 0.325520    |
| 3-hydroxybutyrate    | 0.800000 | 0.043809 | -1.214300   |
| 2-oxoglutarate       | 0.777778 | 0.037440 | 0.059541    |
| isocitrate           | 0.722222 | 0.194042 | -0.316340   |
| Arginine             | 0.722222 | 0.073215 | -0.663710   |
| Malate               | 0.711111 | 0.200600 | -0.324890   |
| Lysine               | 0.700000 | 0.133255 | -0.407210   |
| Histidine            | 0.688889 | 0.161563 | 0.042734    |
| Succinate            | 0.677778 | 0.552268 | -0.090942   |
| Guanidoacetate       | 0.677778 | 0.484068 | -0.077440   |
| Glycerol             | 0.677778 | 0.361132 | -0.058170   |
| Glycine              | 0.677778 | 0.278621 | -0.046765   |
| Lactate              | 0.666667 | 0.165868 | 0.190050    |
| Cholate              | 0.655556 | 0.447237 | -0.399990   |
| Leucine              | 0.644444 | 0.584713 | -0.059809   |
| Glutamine            | 0.644444 | 0.253266 | -0.058968   |
| TMAO                 | 0.633333 | 0.473030 | -0.360990   |
| Glycocholate         | 0.633333 | 0.587676 | -0.249030   |
| 2-Hydroxyisovalerate | 0.633333 | 0.450234 | -0.296920   |
| Pyruvate             | 0.633333 | 0.322941 | -0.544070   |
| Proline              | 0.622222 | 0.165043 | -0.409370   |
| isoleucine           | 0.600000 | 0.551199 | -0.248350   |
| Valine               | 0.600000 | 0.821485 | -0.221940   |
| Choline              | 0.600000 | 0.657629 | -0.099450   |
| Isobutylate          | 0.588889 | 0.534800 | -0.093094   |
| Tyrosine             | 0.588889 | 0.383433 | -0.260870   |
| Carnitine            | 0.588889 | 0.490539 | -0.058966   |
| Aspartate            | 0.566667 | 0.661229 | -0.104220   |
| Glutamate            | 0.566667 | 0.585465 | -0.122210   |

---

|                     |          |          |           |
|---------------------|----------|----------|-----------|
| Fumarate            | 0.566667 | 0.540140 | -0.077136 |
| 3-Hydroxykynurenine | 0.566667 | 0.361962 | -0.373130 |
| TMA                 | 0.555556 | 0.809290 | -0.188920 |
| 1-Methylhistidine   | 0.555556 | 0.601936 | -0.076356 |
| Taurine             | 0.544444 | 0.847011 | -0.270100 |
| Betaine             | 0.544444 | 0.882898 | -0.234360 |
| Serine              | 0.544444 | 0.392849 | -0.035399 |
| Methanol            | 0.533333 | 0.843785 | -0.144880 |
| Glucose             | 0.533333 | 0.809048 | -0.155590 |
| Acetate             | 0.522222 | 0.656530 | -0.160960 |
| Asparagine          | 0.511111 | 0.665007 | -0.067071 |
| Phenylalanine       | 0.511111 | 0.889394 | -0.193470 |
| Oxypurinol          | 0.511111 | 0.999294 | -0.151850 |

---
